# Supplementary material for: A probabilistic analysis reveals fundamental limitations with the environmental impact quotient and similar systems for rating pesticide risks
Source: PeerJ. 2014 Apr 22;2:e364. doi: 10.7717/peerj.364 (PMC4006226; doi:10.7717/peerj.364)
Supplement: Supplemental Information [file peerj-02-364-s001.xlsx]

## Sheet: CB_DATA_
Crystal Ball Data
Workbook Variables	Last Var Column	0
Name:
Value:
Worksheet Data	Last Data Column Used
	2
Sheet Ref
#REF!	#REF!
Sheet Guid
a755e0ab-2746-4a1d-86d4-c411c9bcde74	fc8d261a-0610-498f-ae29-5da856f83b38
Deleted sheet count
Last row used
31	31
Data blocks
CB_Block_0	CB_Block_7.0.0.0:1
㜸〱敤㕣㕢㙣ㅣ㔷ㄹ摥ㄹ敦慣㜷搶㜶散挶改㈵改捤㔰摡搲㍡戸㜱搲昴〶㈱昸搲摣㜰㘲㌷㜶搲愲㔲㙤挶扢㘷散㘹㜶㘶摣㤹㔹挷㉥㤵㕡㑡㑢㔵㉥〵㉡ㄵ〴㤴㕢㠵㤰㄰ㄲ㤷㤷㜲敢ぢㄲㄲ〸愵ㄲて昰㠰㠴㔰愹㄰㝤〰愱〸㈴搴㠷㑡攵晢捥捣散捥敥㝡挷敥戶〵ㄷ昹愴㝢㝣收摣收㥣晦㝥晥晦㑣㌳㑡㈶㤳㜹ㅤ㠹㝦㤹戲㉣㕣㌱扢敡〷挲ㅥ㤹㜰㉢ㄵ㔱ち㉣搷昱㐷挶㍣捦㔸㥤戲晣愰ぢㅤ㜲㐵ぢ敤扥㔶昴慤〷㐵扥戸㉣㍣ㅦ㥤戴㑣㈶㥦搷㔵戴㜳ㄲ晥〶攲〷㥤愳㝡戳挸收㈶挶愷攷敦挷慣戳㠱敢㠹摤㐳愷挳戱〷㐶㐷㐷㐶㐷昶摤扣敦㤶㤱㍤扢㠷㈶慡㤵愰敡㠹〳㡥愸〶㥥㔱搹㍤㌴㔳㥤慦㔸愵て㡢搵㌹昷慣㜰づ㠸昹㍤晢收㡤㥢㙦ㅢ扤㜹晦㝥昳昶摢㙦敢挵慢㌳㈷㈶挶㘷㍣㘱晡㙦搱㥣ㅡ㤷㝣昳愴㈸㔹摣㥢㄰㥥攵㉣㡣㑣㡣攳扦挴晡昱㜴敢挸散愲㄰〱㕦㉤㍣攱㤴㠴慦㘳㘰㡦㍤收晢㔵㝢㠹挰搳敤㐳搸㙡挹昰〳捤㥥㄰㤵㡡㙥挷戳收敤㘹挰慥㘲慣昶摡戳挲昱慤挰㕡戶㠲搵㥣㍤㠷㠹捡㝤昶㈹㕦㥣㌴㥣〵㜱挲戰㠵㘶ㅦ慥㕡攵㙣㤸㌲㕤搷挷㔳㈴ㄷ㈶户㍦㌲…	㜸〱敤㕣㝤㤸㥢㔵㤵捦捤㈴㤹摣捣㑣㈷戴愵㔰㍥愷戶㠵㝥㌱㜶攸㌷愵戶搳㤹㑥㕢㤸㝥㑥㕢㉣ㄴ愶㤹攴㑤㈷㌴ㅦ搳㈴搳捥㐰搹〲〵ㄱ㕣ㅥ㔷ㄱ昶愹搴〷〴㔹㘱昹㜲㜱户㉡戲〸〸㉡㙥㤷㐷㝤㔰㘱ㄱ㉤攸扡敢挲㙡搱搵㘵搷戲散敦㜷摥昷㑤摥㈴㙦㌲戵戶㡦晤挳摢收攴摣㜳捦㍤昷摥㜳捥晤扥ㄹ㡦昲㜸㍣敦㈳昰㥢挱㐷攴慣㥥攱㕣摥㐸戵㜶㘴㤲㐹㈳㥡㑦㘴搲戹搶昶㙣㌶㌲摣㥤挸攵敢挰㄰攸㑤㈰㍤攷敦捤㈵慥㌱㠲扤㍢㡤㙣づ㑣㝥㡦㈷ㄸ搴㕥愴〷慤㑦搸㡥㘸收搲㍥〲㜰㜹㜴㠰愰㥥㠰慣㕡ㄳ㠴〰ㅡㅢ〰㌶㜴㉣㕤搳㜷㌵ち敥挹㘷戲挶㡣㤶㑤愶昸㐵㙤㙤慤㙤慤戳㘶捦㥡摢㍡㜳㐶㑢挷㘰㌲㍦㤸㌵ㄶ愵㡤挱㝣㌶㤲㥣搱戲㜶戰㉦㤹㠸㕥㙡っ㙦挸㙣㌷搲㡢㡣扥㤹戳晡㈲戳攷户捤㥥㌳㈷扥㘰挱晣挶㐶㐸㕥摤戱㜴㙤搶㠸攷㡥㤷捣㈶捡㕣搳戱戴㜵戵㤱㍦㕥㌲㐷㐱㈶㐴㜶㘶㔲㤱㐴晡㌸〹昵㔳晤戳㍡㡤㘸㠲㜶㌲㡣㙣㈲扤慤ㄵ搵㉥㔱㌴㘲昳㕡扢愰昱㘸㈴㤷敦㌰㤲挹昵㐶㥣㈶㙡㑣㔱㘷㐶搶㐸㐷㡤摣愸搴戲愱愸㤱戴㤲㜳挱搴愶㐸㜶㜵㈴㘵昸㠸㌴愷…
Decisioneering:7.0.0.0	Decisioneering:7.0.0.0
CB_Block_7.0.0.0:1	CB_Block_0
㜸〱捤㔸㑤㙣ㅢ㐵ㄴ昶慥扤敢㕤摢㘹摤扦昴扦㌵㈸戴㡤ㄲ摣戸㐹攸㥦慡㌶戶昳㔷摡㈴慤摤昴㔴㔶㙢敦㙣扣捤晥㤸㤹㜵ㄲ㤷〳ㄷ挴つ挱㠵〳ㄲ昷㈲㈱昵搰㈳攲挸〵挴㡦㤰戸㈰〱愲㠸㑢ㄱ攲㠴㉡づ㈰㜸㙦搶㑥㙣挷愱㙤〸㔲愷捤㜸㘶摥扣㌷㌳㙦摥晢摥㥢つ〹愱㔰攸㙦㈸昸㡢㈵㠲㡤㐳㠵㍡昳㠹㤳捥㜹戶㑤捡扥攵戹㉣㍤㐶愹㕥扦㘲㌱㍦っㄳ㘴捤〲㍡㤳㌴㘶摤㈱㡡戶㐴㈸㠳㐹㔲㈸愴㈸慡〸㜴ㄴ㠲㝦挹㘶㐷㐵慥㐴〴慡㘲㉥㍢㕢扡つ㔲ぢ扥㐷挹㘰㙡㍥攰扤㤰挹愴㌳改攱㤱攱㤷搲㐳㠳愹㕣捤昶㙢㤴㕣㜰㐹捤愷扡㍤㤸㥡慢㤵㙣慢晣㌲愹ㄷ扤㐵攲㕥㈰愵愱攱㤲㍥㜲㈶㌳㌲㍡㙡㥥㍤㝢㈶〱㑢㠷收㜲搹㈹㘲㔷㐱摥㔶㐹㤵㐱敡㑣㉥㍢㐷㠹戹㔵㌲㈵㔴㐴㈶㑦捡ㄶ㙡㡣㄰㙡戹ぢ改㕣ㄶ晥户㘸〵㝡愷搳戳㠵〲㜱㤹攵㕢㑢㤶㕦挷昳愹捥㙣戹㌴慦摢㌵㈲㍢㝣㑢㡡㌳慦搳ㄹ摤㈱㍤捥つ㐶慥敢敥〲挱㥥攴㑣搶㉣㈳〲㌷ㄹ敥敦戶㔰㐳㐹改搹㕣㌶㔷搱愹捦㐵攲〲㈷扢捤收㉢愵㕢戶挲㜹昸㈸慡㐷㠸㌷㙣㠵慦㠹扢㡣㘲愵㐰㈵慢㔰敤㙡攱㑣㜱搶㔴㐶㠸…	㜸〱敤㕣㕢㙣ㅣ㔷ㄹ摥ㄹ敦慣㜷搶㜶散挶㘹摡㠴㕥摣ㅢ愵㜱㜰攳愴改〵〸挱㤷收搲㍡戱ㅢ㍢㘹ㄱ愰捤㜸昷㡣㍤捤捥㡣㍢㌳敢搸愵㔲ぢ戴㔴摣ち㔴㉡㤷㔲㈸慡㄰㠸ㄷ㙥て㐰愱㉦㈰㈴㄰〴〹㈱㜸㐰攲愱㈰〴て㈰ㄴ㠹㤷㍥㔴㤴敦㍢㌳戳㍢扢敢ㅤ扢摢ㄶ㕣攴㤳敥昱㤹㜳㥢㜳晥晢昹晦㌳捤㈸㤹㑣收ㄵ㈴晥㘵捡戲㜰挵散慡ㅦ〸㝢㘴挲慤㔴㐴㈹戰㕣挷ㅦㄹ昳㍣㘳㜵捡昲㠳㉥㜴挸ㄵ㉤戴晢㕡搱户ㅥㄴ昹攲戲昰㝣㜴搲㌲㤹㝣㕥㔷搱捥㐹昸ㅢ㠸ㅦ㜴㡥敡捤㈲㥢㥢ㄸ㥦㥥扦ㅦ戳捥〶慥㈷昶づ㥤〹挷ㅥㅡㅤㅤㄹㅤ㌹㜰换㠱㕢㐷昶敤ㅤ㥡愸㔶㠲慡㈷づ㌹愲ㅡ㜸㐶㘵敦搰㑣㜵扥㘲㤵敥ㄶ慢㜳敥㌹攱ㅣㄲ昳晢づ捣ㅢ户摣㍥㝡换挱㠳收ㅤ㜷摣摥㡢㔷㘷㑥㑥㡣捦㜸挲昴㕦愷㌹㌵㉥昹㤶㐹㔱戲戸㌷㈱㍣换㔹ㄸ㤹ㄸ挷㝦㠹昵攳改戶㤱搹㐵㈱〲扥㕡㜸挲㈹〹㕦挷挰ㅥ㝢捣昷慢昶ㄲ㠱愷摢㐷戰搵㤲攱〷㥡㍤㈱㉡ㄵ摤㡥㘷捤摢搳㠰㕤挵㔸敤戵㘷㠵攳㕢㠱戵㙣〵慢㌹㝢づㄳ㤵晢散搳扥㌸㘵㌸ぢ攲愴㘱ぢ捤㍥㕡戵捡搹㌰㘵扡㙥㡣愷㐸㉥㑣㙥㝦㘴捣…
Decisioneering:7.0.0.0	Decisioneering:7.0.0.0

## Sheet: Sheet1
Category	Symbol	Value
Long-term health effects	c	0.16
Dermal toxicity (rat LD50)	dt	0.16
Bird toxicity (8 day LC50)	d	0.5
Bee toxicity	z	0.835
Beneficial arthropod toxicity	b	0.835
Fish toxicity (96 hr LC50)	f	0.5
Plant surface half-life	p	0.32
Soil residue half-life	s	0.16
Mode of Action	sy	0.16
Leaching potential	L	0.835
Surface runoff potential	r	0.16
	EIQ	1.19931
	Farm Worker	0.136192
	Consumer and Leaching	0.841144
	Ecological	2.5776
	Total EIQ	1.18498

## Sheet: Sheet3
Percentile values of adjusted EIQ's				Adjusted EIQ equation values
10	50	90	Insecticide	c	dt	d	z	b	f	p	s	sy	l	r
0.86	0.96	1.05	cypermethrin	2	1	1	5	2.8	5	1.9	3	1	1	5
0.66	0.78	0.9	deltamethrin	1	3	1	5	4.23	5	1	1	1	1	5
0.63	0.7	0.77	fenpropathrin	1	1	1	5	4.8	5	1	1	1	1	5
1	1.09	1.18	fenvalerate	1	1	1	5	4.8	5	1.9	3	1	1	5
0.72	0.8	0.87	permethrin	2	1	1	5	5	5	1	3	1	1	5
0.68	0.75	0.82	chlorpyrifos	1	1	3	5	4.51	5	1	1	1	1	5
1.14	1.23	1.32	diazinon	1	1	5	5	4.8	5	1.9	1	1	1	5
1.03	1.12	1.21	dimethoate	1.5	1	1	5	4.5	1	1.9	1	3	5	1
0.7	0.78	0.85	malathion	1.5	1	1	5	5	5	1	1	1	3	3
1.09	1.23	1.37	naled	1.9	3	1	5	3.57	3	1.9	1	1	3	3
0.78	0.87	0.96	acetamiprid	1	1	1	3	4.8	1	1.9	1	3	3	3
0.99	1.08	1.17	clothianidin	1.5	1	3	5	3.57	3	1.9	1	1	3	1
0.77	0.86	0.95	dinotefuran	1	1	1	5	1.44	1	1.9	3	1	5	1
0.89	0.98	1.07	imidacloprid	1	1	5	5	4	3	1.9	1	3	3	1
0.89	0.99	1.08	thiamethoxam	1.5	1	1	5	3.56	5	1.9	3	3	1	1
0.99	1.18	1.38	aldicarb	1	5	5	5	4.8	5	1	3	3	5	1
1.01	1.15	1.28	bendiocarb	1	3	5	5	3.57	3	1.9	1	3	3	3
0.64	0.72	0.79	carbaryl	2.5	1	1	5	4	3	1	1	1	3	3
0.74	0.84	0.93	methiocarb	1	1	1	3	1.44	5	1.9	1	1	3	3
0.88	0.97	1.06	oxamyl	1	1	3	5	4.23	3	1.9	1	1	5	1
